# Supplementary material
Source: publisher figshare collection journal article supplement (https://tandf.figshare.com/articles/dataset/_/5633884)
Supplement: Supplementary file 3 [file 1]

|                                           | Type of couple | N  | %      | Sig. diff. |    |     |      |     |                                                      | Sig. diff. |     |        |         |      |     | Sig. diff.               |       |    |    |     |      |     |        |      |               |      |
|-------------------------------------------|----------------|----|--------|------------|----|-----|------|-----|------------------------------------------------------|------------|-----|--------|---------|------|-----|--------------------------|-------|----|----|-----|------|-----|--------|------|---------------|------|
|                                           |                |    |        | O          | FC | NFC | FRHB | FRW |                                                      | %          | O   | FC     | NFC     | FRHB | FRW |                          | %     | O  | FC | NFC | FRHB | FRW |        | %    |               |      |
| Wife's aspirations: Survival              | O              | 70 | 70.00  | -          | -  | -   | -    | -   | Identity                                             | 12.86      | -   | -      | -       | -    | -   | Business                 | 12.86 | -  | -  | -   | -    | -   | Escape | 2.86 | Side-activity | 1.43 |
|                                           | FC             | 33 | 60.61  | ***        | -  | -   | -    | -   |                                                      | 21.21      | -   | -      | -       | -    | -   |                          | 12.12 | -  | -  | -   | -    | -   | 6.06   | 0.00 |               |      |
|                                           | NFC            | 18 | 44.44  | ***        | ** | -   | -    | -   |                                                      | 22.22      |     |        | -       | -    | -   |                          | 22.22 |    |    | -   | -    | -   | 11.11  | 0.00 |               |      |
|                                           | FRHB           | 18 | 55.56  | ***        | *  |     | -    | -   |                                                      | 16.67      | *   |        |         | -    | -   |                          | 11.11 | ** |    |     | -    | -   | 11.11  | 5.56 |               |      |
|                                           | FRW            | 16 | 50.00  | ***        | ** |     |      | -   |                                                      | 25.00      |     |        |         |      | -   |                          | 12.50 | ** |    |     |      | -   | 6.25   | 6.25 |               |      |
| Husband's aspirations: Survival           | O              | 70 | 54.29  | -          | -  | -   | -    | -   | Identity                                             | 18.57      | -   | -      | -       | -    | -   | Business                 | 17.14 | -  | -  | -   | -    | -   | Escape | 7.14 | Side-activity | 2.86 |
|                                           | FC             | 33 | 33.33  | ***        | -  | -   | -    | -   |                                                      | 42.42      |     |        | -       | -    | -   |                          | 18.18 | -  | -  | -   | -    | -   | 3.03   | 0.00 |               |      |
|                                           | NFC            | 18 | 38.89  | ***        |    | -   | -    | -   |                                                      | 27.78      | *   | **     |         | -    | -   |                          | 16.67 | ** |    |     | -    | -   | 16.67  | 0.00 |               |      |
|                                           | FRHB           | 18 | 33.33  | ***        |    |     | -    | -   |                                                      | 22.22      | **  | **     |         | -    | -   |                          | 27.78 | *  |    |     | -    | -   | 11.11  | 5.56 |               |      |
|                                           | FRW            | 16 | 31.25  | ***        | ^  |     |      | -   |                                                      | 25.00      | **  | **     |         |      | -   |                          | 31.25 | *  |    |     |      | -   | 6.25   | 6.25 |               |      |
| Education wife < husband                  | O              | 70 | 65.71  | -          | -  | -   | -    | -   | Education wife = husband                             | 21.43      | -   | -      | -       | -    | -   | Education wife > husband | 12.86 | -  | -  | -   | -    | -   |        |      |               |      |
|                                           | FC             | 33 | 51.51  | ***        | -  | -   | -    | -   |                                                      | 42.42      |     |        | -       | -    | -   |                          | 6.06  | ** | -  | -   | -    | -   |        |      |               |      |
|                                           | NFC            | 18 | 61.11  | ***        |    | -   | -    | -   |                                                      | 27.78      | **  | **     |         | -    | -   |                          | 11.11 | ** |    |     | -    | -   |        |      |               |      |
|                                           | FRHB           | 18 | 50.01  | ***        | ^  |     |      | -   |                                                      | 33.33      | **  | *      |         |      | -   |                          | 16.67 | *  |    |     | -    | -   |        |      |               |      |
|                                           | FRW            | 16 | 56.25  | ***        | ^  |     |      | -   |                                                      | 31.25      | **  | **     |         |      | -   |                          | 12.50 | ** |    |     |      | -   |        |      |               |      |
| Wife: No formal education                 | O              | 70 | 34.29  | -          | -  | -   | -    | -   | Beyond primary 4                                     | 34.28      | -   | -      | -       | -    | -   | Up to primary 4          | 31.43 |    |    |     |      |     |        |      |               |      |
|                                           | FC             | 33 | 39.39  | *          | -  | -   | -    | -   |                                                      | 27.27      | *** |        | -       | -    | -   |                          | 33.33 |    |    |     |      |     |        |      |               |      |
|                                           | NFC            | 18 | 22.22  | ***        | ** | -   | -    | -   |                                                      | 44.45      | *** |        |         | -    | -   |                          | 33.33 |    |    |     |      |     |        |      |               |      |
|                                           | FRHB           | 18 | 38.89  | ***        |    |     | -    | -   |                                                      | 16.67      | *** | *      |         | ^    | -   |                          | 44.44 |    |    |     |      |     |        |      |               |      |
|                                           | FRW            | 16 | 25.00  | ***        | ** |     |      | -   |                                                      | 62.50      | **  |        |         |      | *   | -                        | 12.50 |    |    |     |      |     |        |      |               |      |
| Husband: No formal education              | O              | 70 | 10.00  | -          | -  | -   | -    | -   | Beyond primary 4                                     | 68.58      | -   | -      | -       | -    | -   | Up to primary 4          | 21.43 |    |    |     |      |     |        |      |               |      |
|                                           | FC             | 33 | 12.12  |            | -  | -   | -    | -   |                                                      | 60.60      | *** |        | -       | -    | -   |                          | 27.27 |    |    |     |      |     |        |      |               |      |
|                                           | NFC            | 18 | 0.00   | ***        | ** |     | -    | -   |                                                      | 94.44      | *** |        |         | -    | -   |                          | 5.556 |    |    |     |      |     |        |      |               |      |
|                                           | FRHB           | 18 | 22.22  |            |    | **  | -    | -   |                                                      | 50.00      | *** | **     |         | ^    | -   |                          | 27.78 |    |    |     |      |     |        |      |               |      |
|                                           | FRW            | 16 | 6.25   | **         |    |     |      | -   |                                                      | 75.00      | *** |        |         |      | -   |                          | 18.75 |    |    |     |      |     |        |      |               |      |
| 'Change agent'                            | O              | 70 | 21.43  | -          | -  | -   | -    | -   | Husband is positive about sharing reproductive tasks | 54.29      | -   | -      | -       | -    | -   |                          |       |    |    |     |      |     |        |      |               |      |
|                                           | FC             | 33 | 27.27  |            | -  | -   | -    | -   |                                                      | 45.45      |     | -      |         | -    | -   |                          |       |    |    |     |      |     |        |      |               |      |
|                                           | NFC            | 18 | 27.78  | **         |    | -   | -    | -   |                                                      | 55.56      |     |        | -       | -    | -   |                          |       |    |    |     |      |     |        |      |               |      |
|                                           | FRHB           | 18 | 27.78  | **         |    |     | -    | -   |                                                      | 55.56      |     |        |         | -    | -   |                          |       |    |    |     |      |     |        |      |               |      |
|                                           | FRW            | 16 | 18.75  | ***        | *  |     |      | -   |                                                      | 50.00      |     |        |         |      | -   |                          |       |    |    |     |      |     |        |      |               |      |
| Cassava as primary or secondary cash crop | O              | 70 | 38.57  | -          | -  | -   | -    | -   | Matoke bananas as (second) most important food       | 57.14      | -   | -      | -       | -    | -   |                          |       |    |    |     |      |     |        |      |               |      |
|                                           | FC             | 33 | 33.33  |            | -  | -   | -    | -   |                                                      | 45.45      |     | -      | -       | -    | -   |                          |       |    |    |     |      |     |        |      |               |      |
|                                           | NFC            | 18 | 27.78  |            |    | -   | -    | -   |                                                      | 61.11      |     |        | -       | -    | -   |                          |       |    |    |     |      |     |        |      |               |      |
|                                           | FRHB           | 18 | 33.33  |            |    |     | -    | -   |                                                      | 55.56      |     |        |         | -    | -   |                          |       |    |    |     |      |     |        |      |               |      |
|                                           | FRW            | 16 | 37.50  |            |    |     |      | -   |                                                      | 62.50      |     |        |         |      | -   |                          |       |    |    |     |      |     |        |      |               |      |
|                                           |                | N  | Avg.   | St.Dev.    |    |     |      |     |                                                      |            | N   | Avg.   | St.Dev. |      |     |                          |       |    |    |     |      |     |        |      |               |      |
| Wife's off-farm income                    | O              | 70 | -0.076 | 0.894      | -  | -   | -    | -   | Husband's off-farm income                            | O          | 70  | 0.038  | 1.016   | -    | -   | -                        | -     | -  | -  | -   | -    | -   | -      | -    | -             |      |
|                                           | FC             | 33 | -0.062 | 0.760      |    | -   | -    | -   |                                                      | FC         | 33  | -0.077 | 0.955   |      | -   | -                        | -     | -  | -  | -   | -    | -   | -      | -    |               |      |
|                                           | NFC            | 18 | 0.063  | 1.129      |    |     | -    | -   |                                                      | NFC        | 18  | 0.065  | 1.147   |      |     | -                        | -     | -  | -  | -   | -    | -   | -      | -    |               |      |
|                                           | FRHB           | 18 | -0.286 | 0.429      |    |     |      | -   |                                                      | FRHB       | 18  | -0.136 | 0.873   |      |     |                          | -     | -  | -  | -   | -    | -   | -      | -    |               |      |
|                                           | FRW            | 16 | 0.713  | 1.739      | *  | ^   |      | **  | -                                                    | FRW        | 16  | 0.073  | 1.077   |      |     |                          |       | -  | -  | -   | -    | -   | -      | -    |               |      |
| Age wife                                  | O              | 70 | 37.17  | 12.01      | -  | -   | -    | -   | Age husband                                          | O          | 70  | 43.16  | 12.42   | -    | -   | -                        | -     | -  | -  | -   | -    | -   | -      | -    | -             |      |
|                                           | FC             | 33 | 34.21  | 9.53       |    | -   | -    | -   |                                                      | FC         | 33  | 43.12  | 13.69   |      | -   | -                        | -     | -  | -  | -   | -    | -   | -      | -    |               |      |
|                                           | NFC            | 18 | 32.61  | 10.73      | ^  |     | -    | -   |                                                      | NFC        | 18  | 37.94  | 10.62   | ^    |     | -                        | -     | -  | -  | -   | -    | -   | -      | -    |               |      |
|                                           | FRHB           | 18 | 39.72  | 12.38      |    | *   | *    | -   | -                                                    | FRHB       | 18  | 48.78  | 14.61   | *    |     | **                       | -     | -  | -  | -   | -    | -   | -      | -    |               |      |
|                                           | FRW            | 16 | 34.75  | 11.40      |    |     |      | -   | -                                                    | FRW        | 16  | 42.94  | 15.94   |      |     |                          | -     | -  | -  | -   | -    | -   | -      | -    |               |      |
| Age difference                            | O              | 70 | -5.99  | 6.31       | -  | -   | -    | -   |                                                      |            |     |        |         |      |     |                          |       |    |    |     |      |     |        |      |               |      |
|                                           | FC             | 33 | -8.91  | 7.77       | ** |     | -    | -   |                                                      |            |     |        |         |      |     |                          |       |    |    |     |      |     |        |      |               |      |
|                                           | NFC            | 18 | -5.33  | 6.13       |    | *   | -    | -   |                                                      |            |     |        |         |      |     |                          |       |    |    |     |      |     |        |      |               |      |
|                                           | FRHB           | 18 | -9.06  | 6.51       | *  |     | *    | -   | -                                                    |            |     |        |         |      |     |                          |       |    |    |     |      |     |        |      |               |      |
|                                           | FRW            | 16 | -8.19  | 7.89       |    |     |      | -   | -                                                    |            |     |        |         |      |     |                          |       |    |    |     |      |     |        |      |               |      |
| Land size                                 | O              | 70 | 2.43   | 1.37       | -  | -   | -    | -   |                                                      |            |     |        |         |      |     |                          |       |    |    |     |      |     |        |      |               |      |
|                                           | FC             | 33 | 2.85   | 1.79       |    | -   | -    | -   | -                                                    |            |     |        |         |      |     |                          |       |    |    |     |      |     |        |      |               |      |
|                                           | NFC            | 18 | 2.61   | 1.42       |    |     | -    | -   | -                                                    |            |     |        |         |      |     |                          |       |    |    |     |      |     |        |      |               |      |
|                                           | FRHB           | 18 | 2.61   | 1.24       |    |     |      | -   | -                                                    |            |     |        |         |      |     |                          |       |    |    |     |      |     |        |      |               |      |
|                                           | FRW            | 16 | 2.44   | 1.36       |    |     |      | -   | -                                                    |            |     |        |         |      |     |                          |       |    |    |     |      |     |        |      |               |      |

\*\*\* significance level 1 percent; \*\* 5 percent; \* 10 percent; ^ 15 percent; Adjusted Wald test.

Type of couples: FC= Fair Co-operator; NFC= Co-operator but not fair; FRHB= with Freeriding Husband; FRW=with Freeriding Wife; O= Other.

Aspirations with regard to farming: Survival: 'Farming is the only option to survive and provide in a livelihood'; Identity: 'Farming is a part of my culture and identity'; Business: 'Farming as a business'; Escape: 'Hoping to escape farming and find a future outside of farming'; Side-activity: 'Farming is a side-activity to other income generating activities'.

Off-farm income that respondents reported to have earned during three months prior to data collection. To deal with outliers, husbands' off-farm income has been topped of at 700.000 UGX, wives' at 400.000 UGX, after which the indicator was standardized.

*Table 10: Characteristics of the different types of couples*
