# Supplementary material
Source: publisher figshare collection journal article supplement (https://tandf.figshare.com/articles/dataset/_/5633884)
Supplement: Supplementary file 4 [file 1]

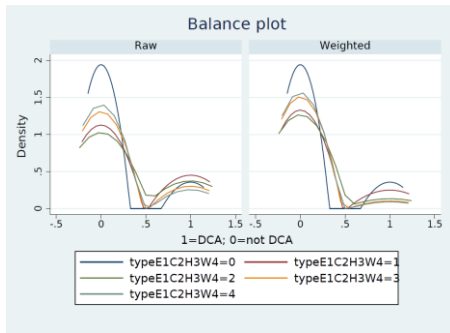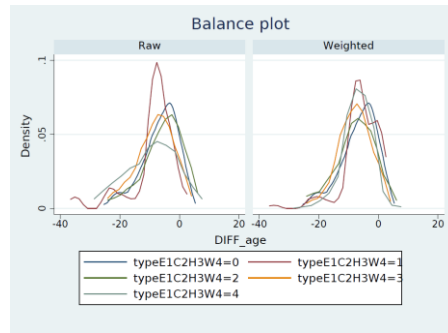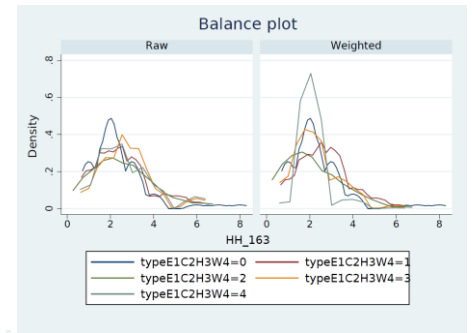

'Change agent'

Age difference

Land size

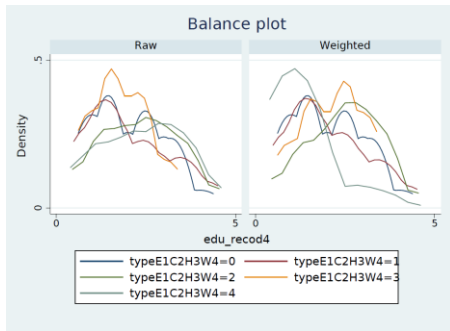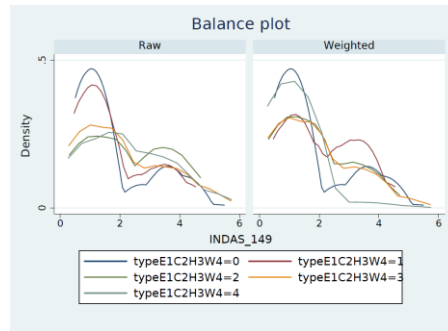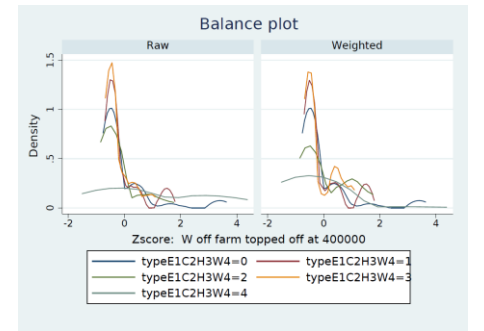

Wife's education level

Wife's aspirations

Wife's off-farm income

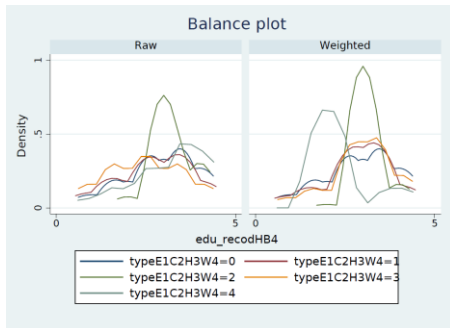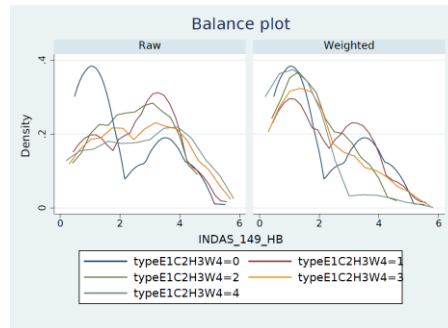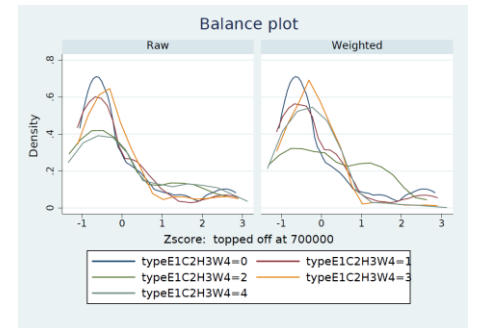

Husband's education level

Husband's aspirations

Husband's off-farm income

Figure 1: Kernel density plots of matching covariates over treatment levels – Models estimating adoption rates of sustainable intensification practices for coffee production [Other (O) couples (typeE1C2H3W4=0), Fair Co-operator (FC) couples (typeE1C2H3W4=1), Co-operator but not fair (NFC) couples (typeE1C2H3W4=2), Couples with Free-riding Husband (FRHB) (typeE1C2H3W4=3), Couples with Free-riding Wife (FRW) (typeE1C2H3W4=4)]

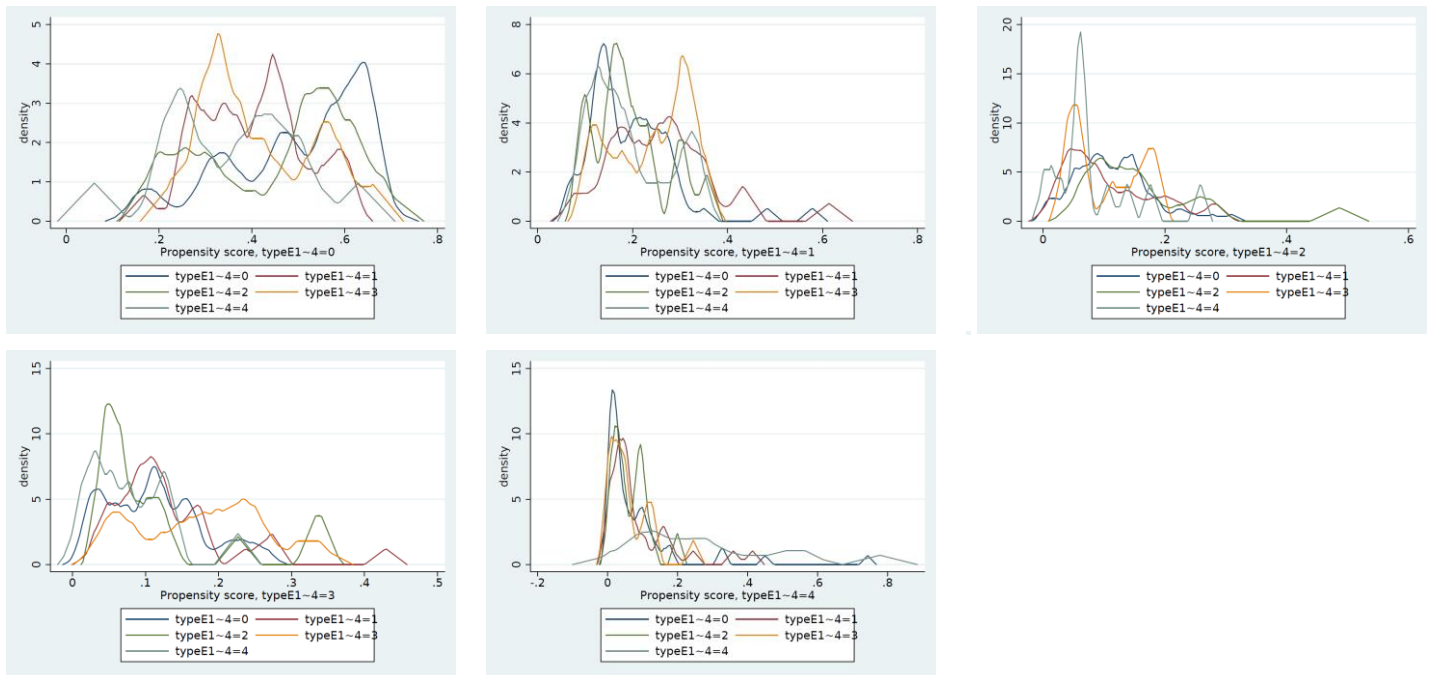

Figure 2: Estimated densities of the probability of getting each treatment level – Models estimating adoption rates of sustainable intensification practices for coffee production [Other (O) couples (typeE1-4=0), Fair Co-operator (FC) couples (typeE1-4=1), Co-operator but not fair (NFC) couples (typeE1-4=2), Couples with Free-riding Husband (FRHB) (typeE1-4=3), Couples with Free-riding Wife (FRW) (typeE1-4=4)]

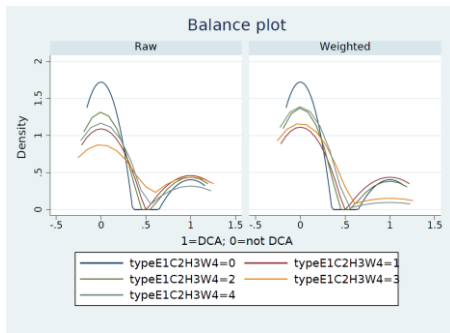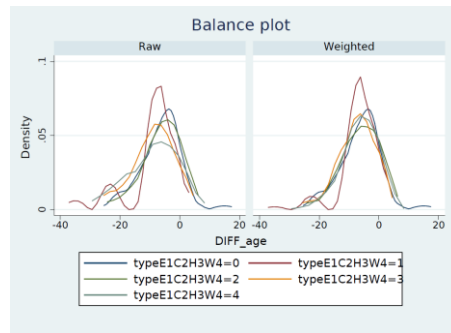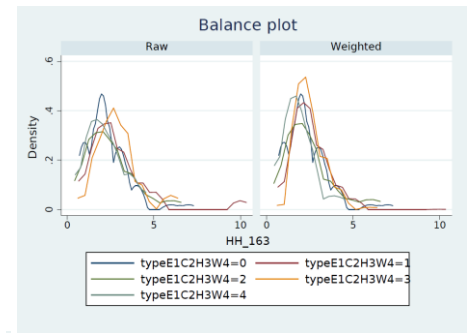

'Change agent'

Age difference

Land size

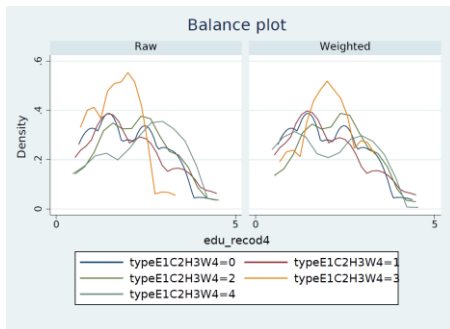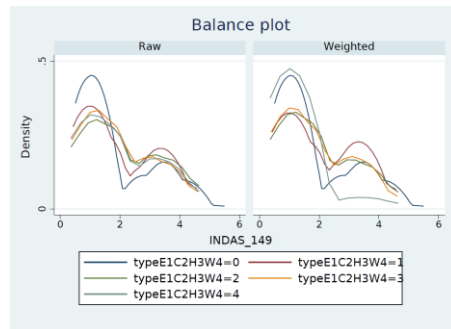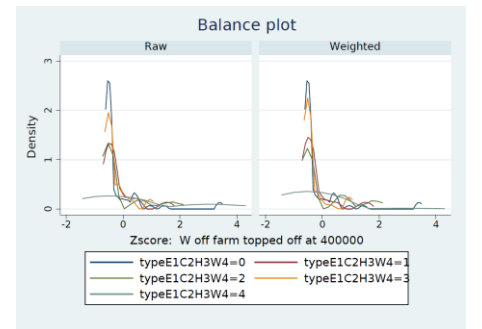

Wife's education level

Wife's aspirations

Wife's off-farm income

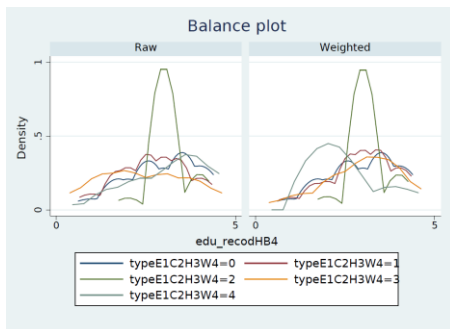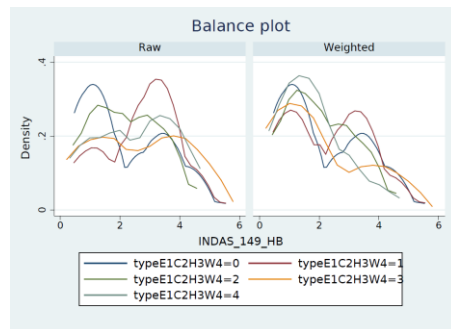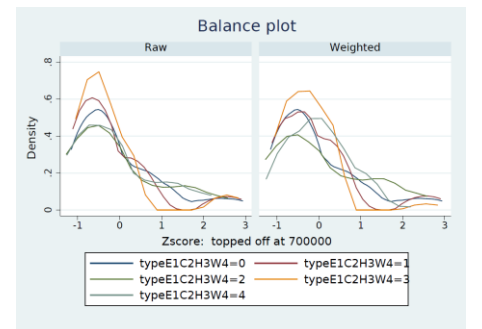

Husband's education level

Husband's aspirations

Husband's off-farm income

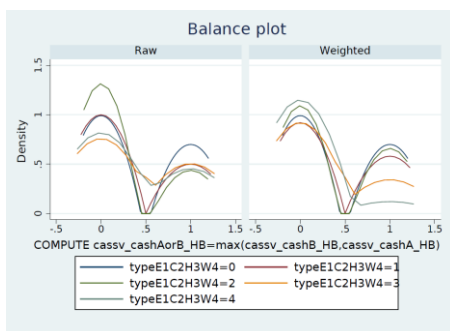

Cassava as primary or secondary cash crop

Figure 3: Kernel density plots of matching covariates over treatment levels – Models estimating adoption rates of sustainable intensification practices for cassava production [Other (0) couples (typeE1C2H3W4=0), Fair Co-operator (FC) couples (typeE1C2H3W4=1), Co-operator but not fair (NFC) couples (typeE1C2H3W4=2), Couples with Free-riding Husband (FRHB) (typeE1C2H3W4=3), Couples with Free-riding Wife (FRW) (typeE1C2H3W4=4)]

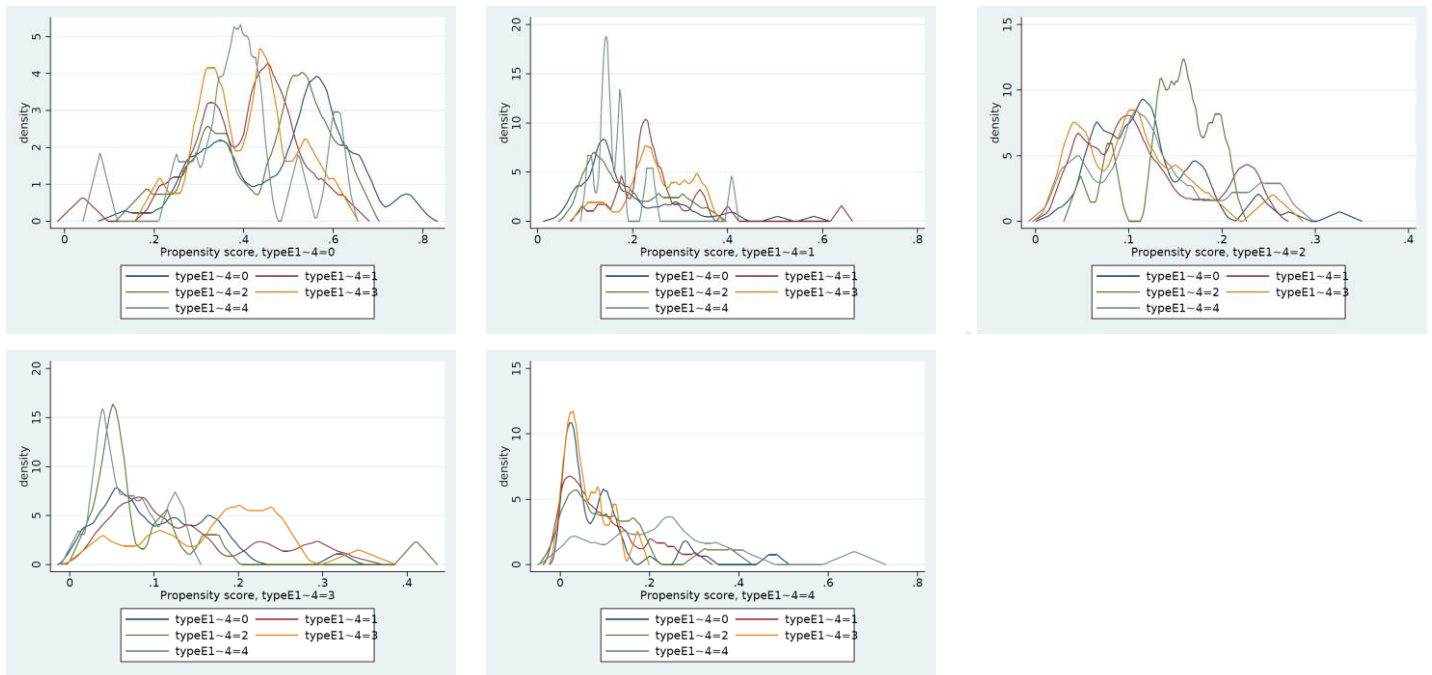

Figure 4: Estimated densities of the probability of getting each treatment level – Models estimating adoption rates of sustainable intensification practices for cassava production [Other (O) couples (typeE1-4=0), Fair Co-operator (FC) couples (typeE1-4=1), Co-operator but not fair (NFC) couples (typeE1-4=2), Couples with Free-riding Husband (FRHB) (typeE1-4=3), Couples with Free-riding Wife (FRW) (typeE1-4=4)]

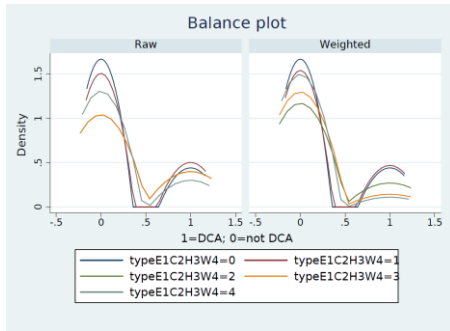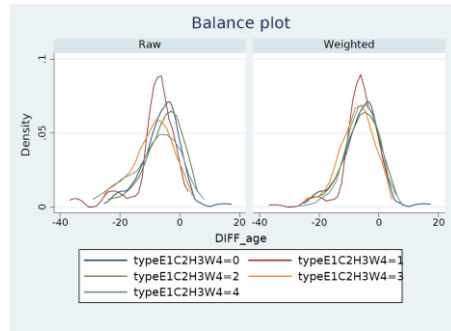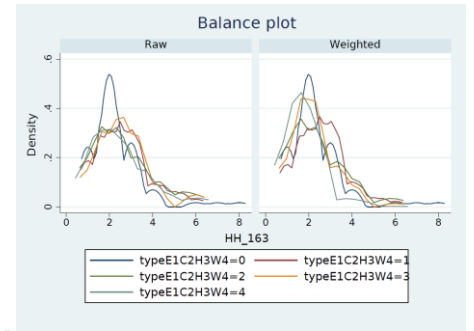

'Change agent'

Age difference

Land size

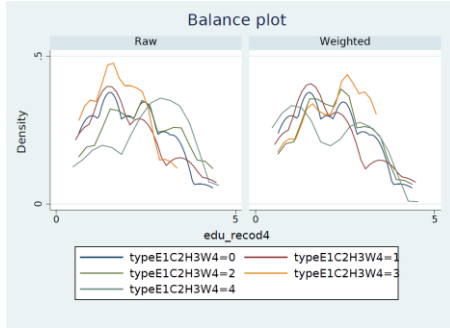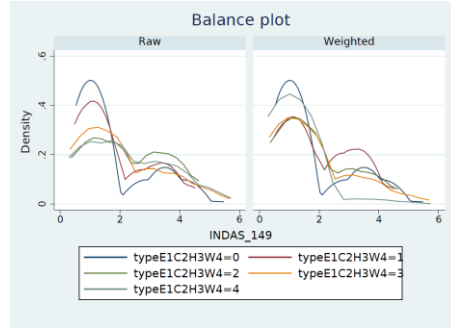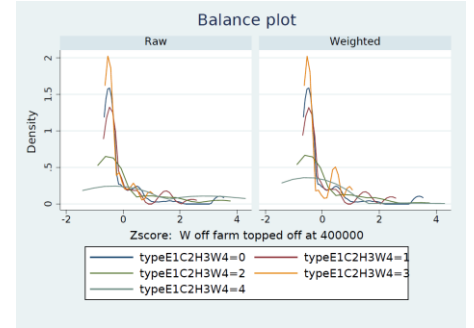

Wife's education level

Wife's aspirations

Wife's off-farm income

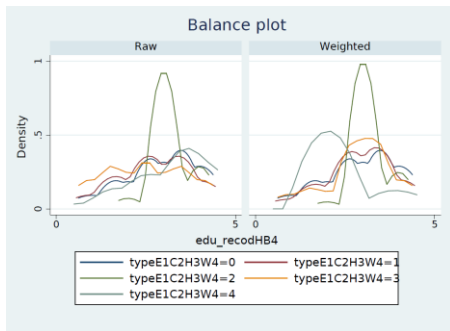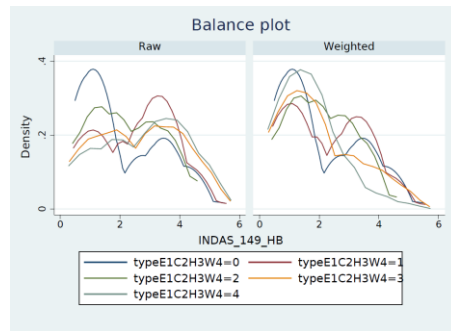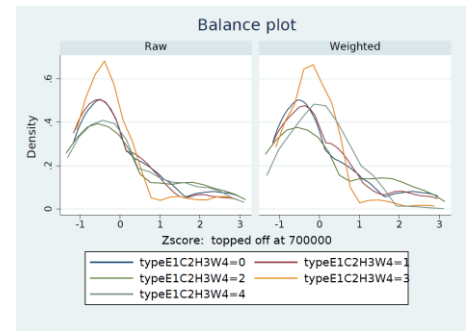

Husband's education level

Husband's aspirations

Husband's off-farm income

Figure 5: Kernel density plots of matching covariates over treatment levels – Models estimating intra-household time allocation, resource sharing, and (evolution of) household wellbeing [Other (O) couples (typeE1C2H3W4=0), Fair Co-operator (FC) couples (typeE1C2H3W4=1), Co-operator but not fair (NFC) couples (typeE1C2H3W4=2), Couples with Free-riding Husband (FRHB) (typeE1C2H3W4=3), Couples with Free-riding Wife (FRW) (typeE1C2H3W4=4)]

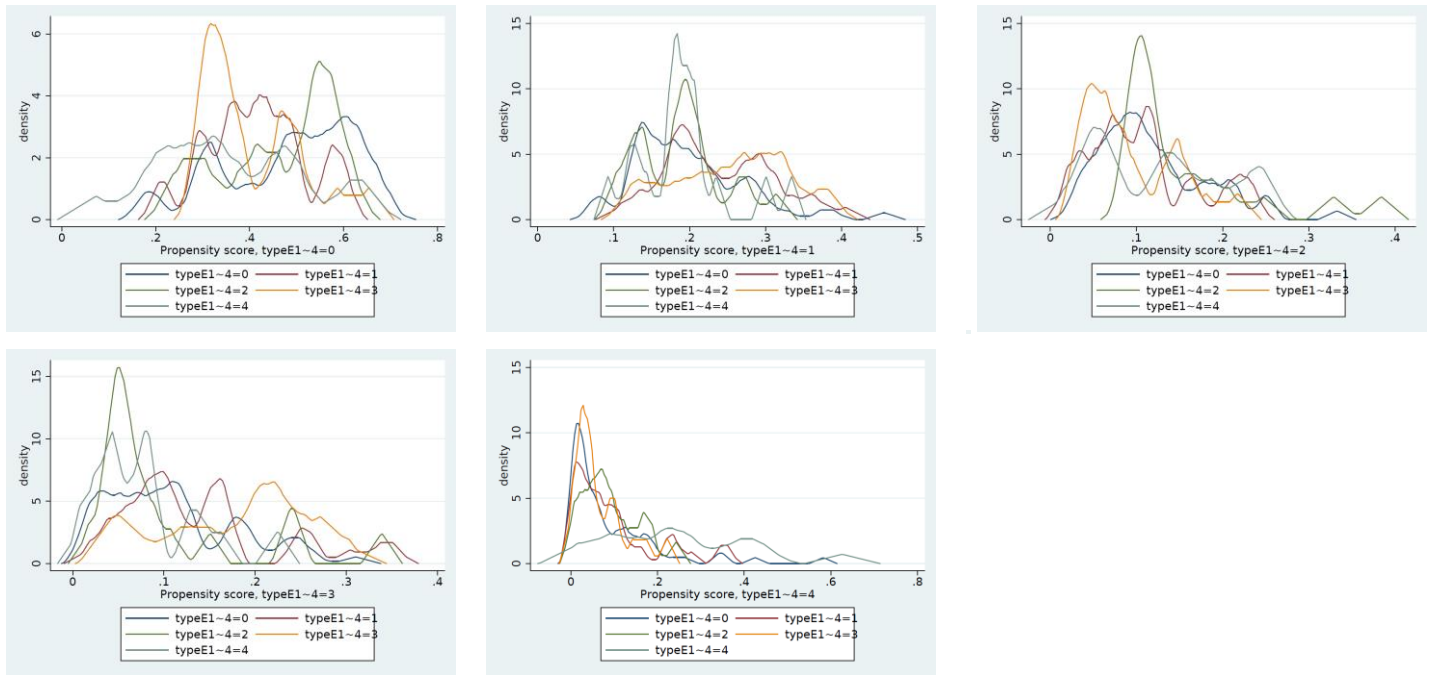

Figure 6: Estimated densities of the probability of getting each treatment level – Models estimating intra-household time allocation, resource sharing, and (evolution of) household wellbeing [Other (O) couples (typeE1~4=0), Fair Co-operator (FC) couples (typeE1~4=1), Co-operator but not fair (NFC) couples (typeE1~4=2), Couples with Free-riding Husband (FRHB) (typeE1~4=3), Couples with Free-riding Wife (FRW) (typeE1~4=4)]

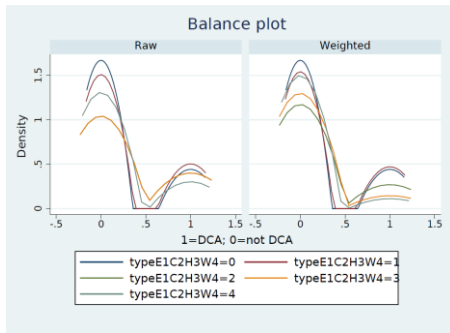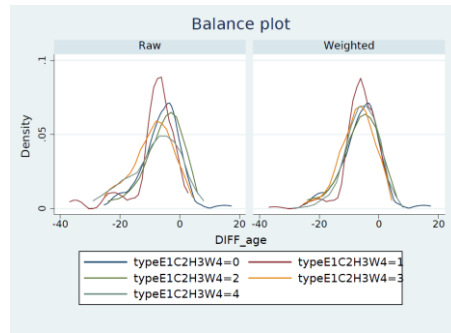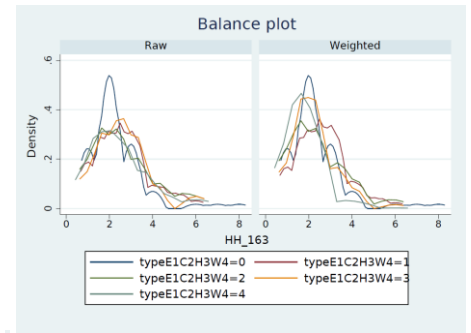

Change agent'

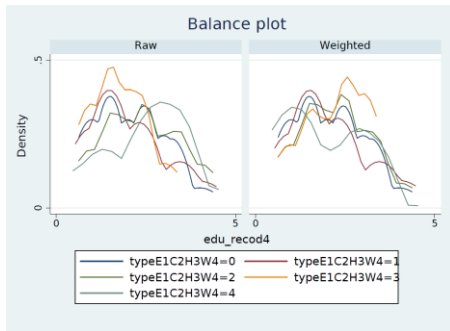

Age difference

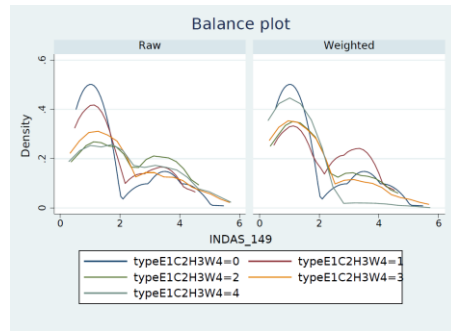

Land size

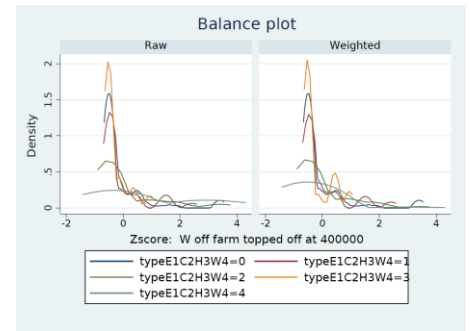

Wife's education level

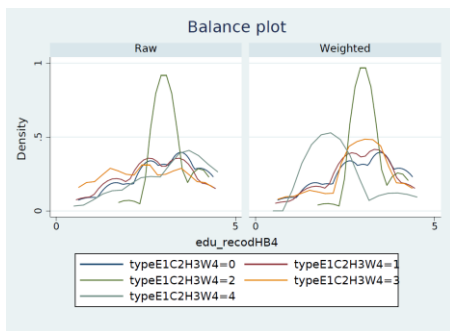

Wife's aspirations

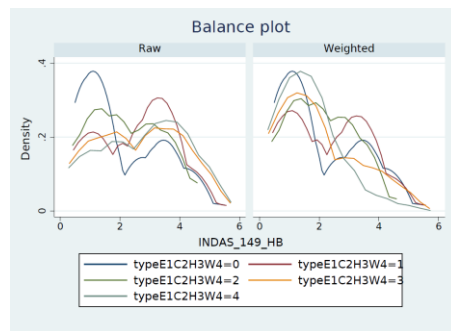

Wife's off-farm income

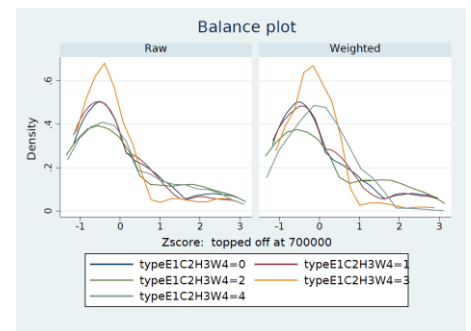

Husband's education level

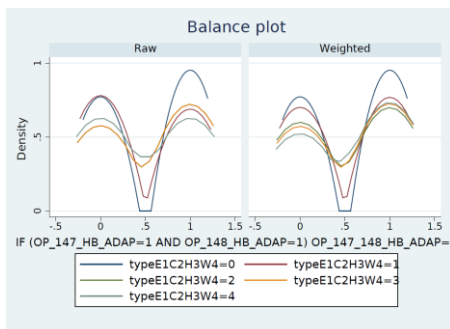

Husband's aspirations

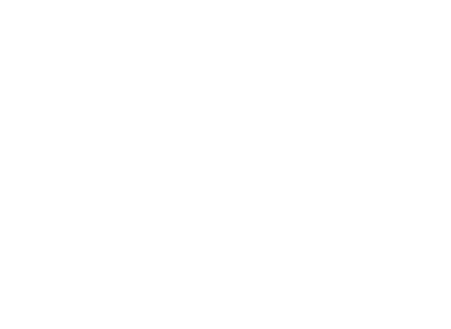

Husband's off-farm income

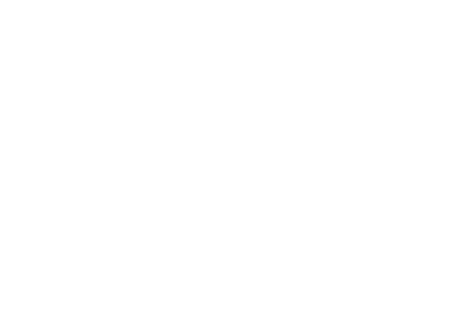

Husband is positive about sharing reproductive tasks

Figure 7: Kernel density plots of matching covariates over treatment levels – Model estimating intra-household time allocation to reproductive tasks, additionally matched on husband's opinion [Other (O) couples (typeE1C2H3W4=0), Fair Co-operator (FC) couples (typeE1C2H3W4=1), Co-operator but not fair (NFC) couples (typeE1C2H3W4=2), Couples with Free-riding Husband (FRHB) (typeE1C2H3W4=3), Couples with Free-riding Wife (FRW) (typeE1C2H3W4=4)]

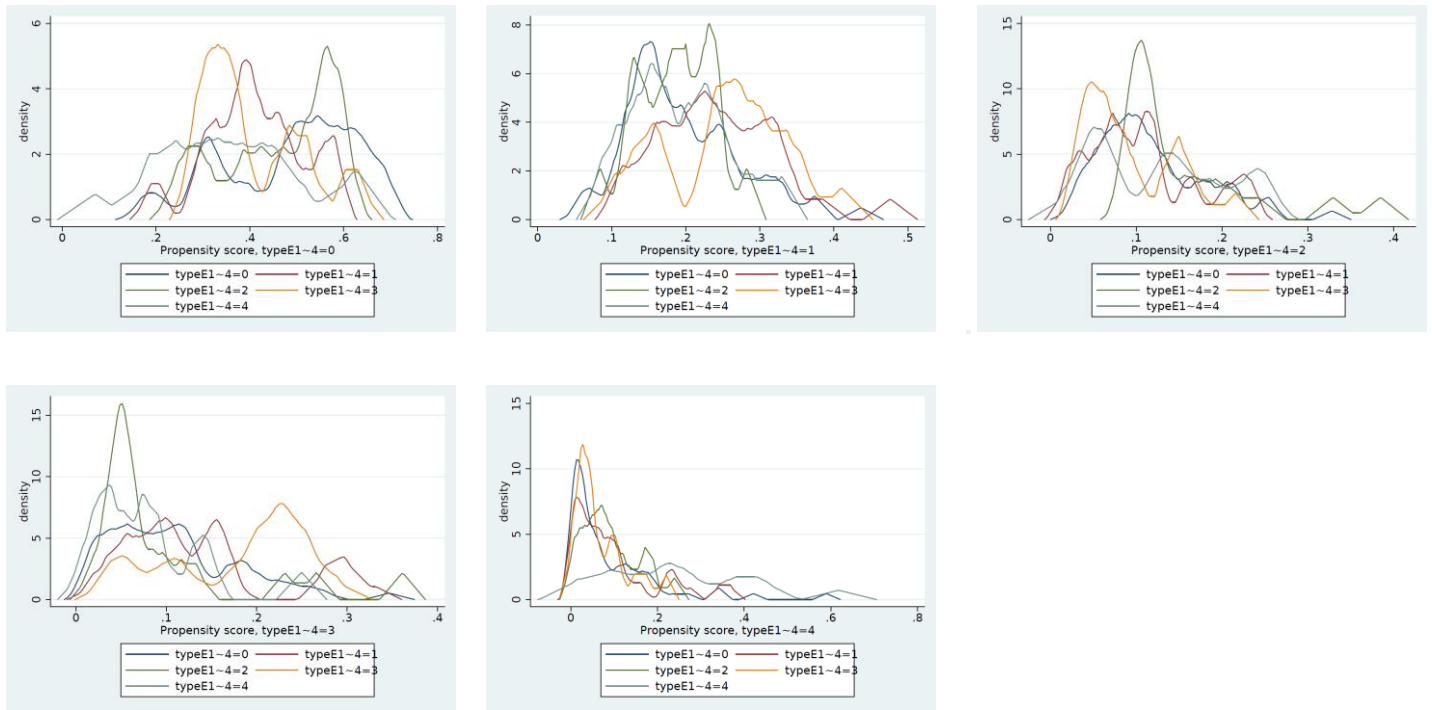

Figure 8: Estimated densities of the probability of getting each treatment level – Model estimating intra-household time allocation to reproductive tasks, additionally matched on husband's opinion [Other (O) couples (typeE1~4=0), Fair Co-operator (FC) couples (typeE1~4=1), Co-operator but not fair (NFC) couples (typeE1~4=2), Couples with Free-riding Husband (FRHB) (typeE1~4=3), Couples with Free-riding Wife (FRW) (typeE1~4=4)]



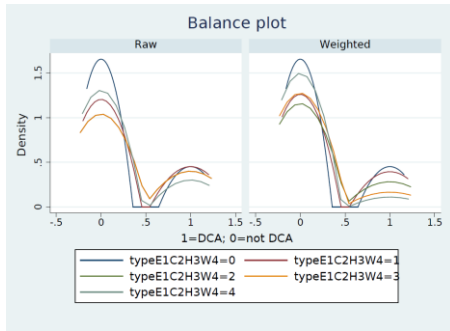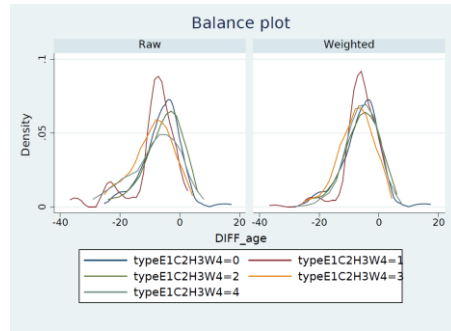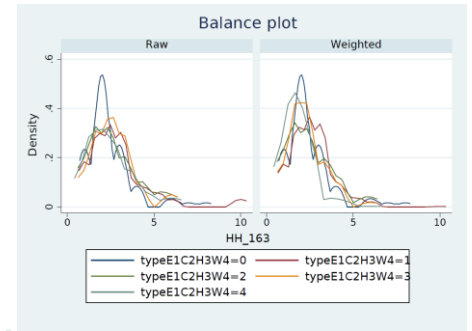

'Change agent'

Age difference

Land size

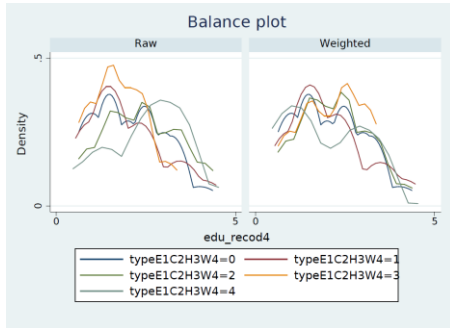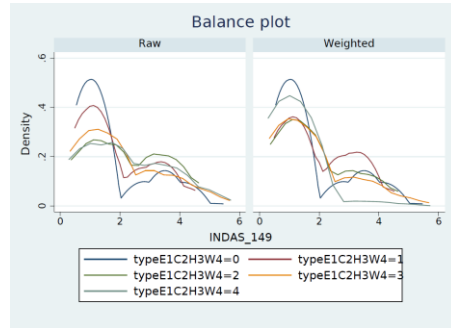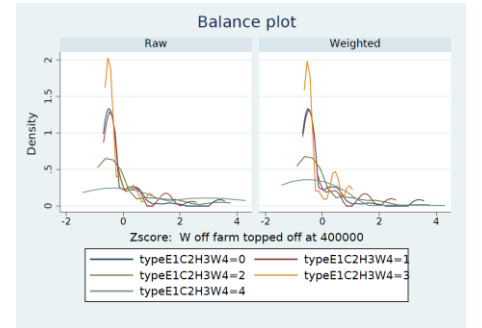

Wife's education level

Wife's aspirations

Wife's off-farm income

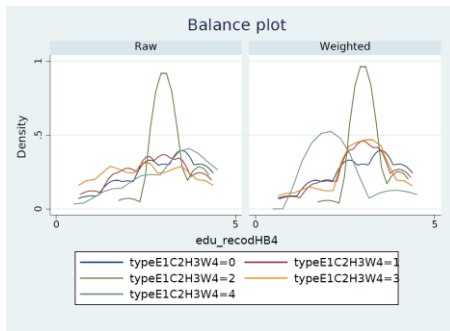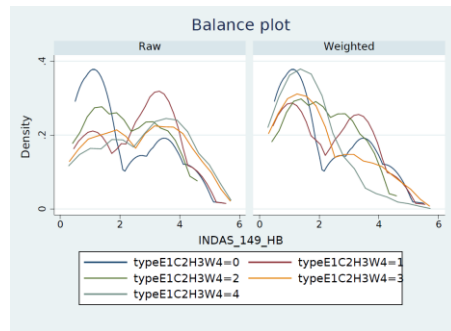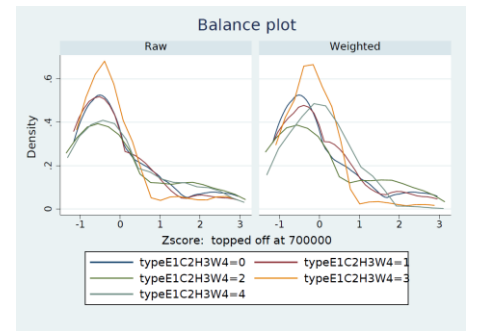

Husband's education level

Husband's aspirations

Husband's off-farm income

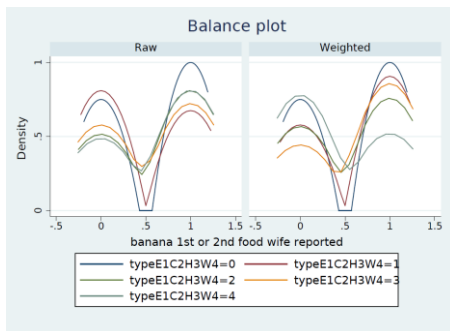

Matoke bananas as (second) most important food

Figure 9: Kernel density plots of matching covariates over treatment levels – Models estimating (evolution of) food security, additionally matched on growing Matoke bananas as (second) most important food [Other (O) couples (typeE1C2H3W4=0), Fair Co-operator (FC) couples (typeE1C2H3W4=1), Co-operator but not fair (NFC) couples (typeE1C2H3W4=2), Couples with Free-riding Husband (FRHB) (typeE1C2H3W4=3), Couples with Free-riding Wife (FRW) (typeE1C2H3W4=4)]

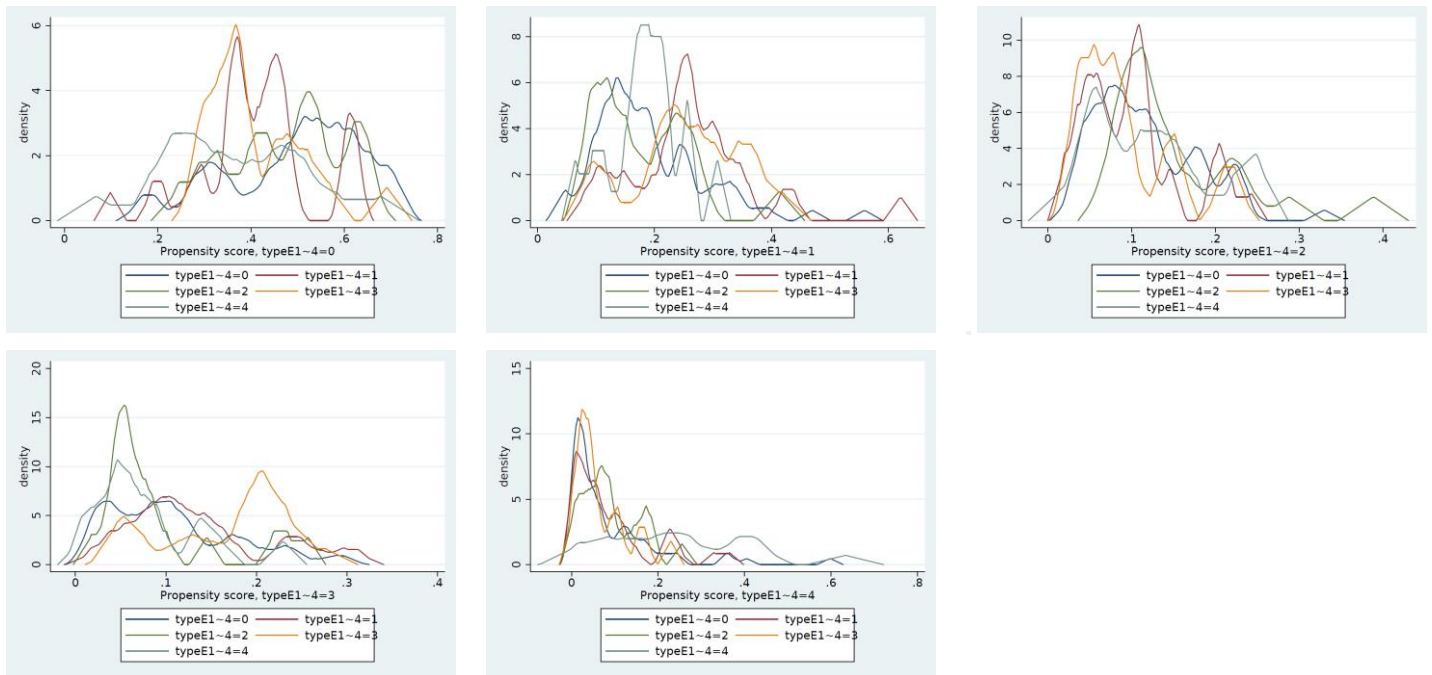

Figure 10: Estimated densities of the probability of getting each treatment level – Models estimating (evolution of) food security, additionally matched on growing Matoke bananas as (second) most important food [Other (O) couples (typeE1~4=0), Fair Co-operator (FC) couples (typeE1~4=1), Co-operator but not fair (NFC) couples (typeE1~4=2), Couples with Free-riding Husband (FRHB) (typeE1~4=3), Couples with Free-riding Wife (FRW) (typeE1~4=4)]
